# Supplementary material for: Discovering Potential RNA Dependent RNA Polymerase Inhibitors as Prospective Drugs Against COVID-19: An in silico Approach
Source: PubMed Central journal article supplement (PMC7952625; doi:10.3389/fphar.2021.634047), 2021-02-26
Supplement: datasheet1.pdf [file datasheet1.pdf]

## Supplementary data

### **“Discovering potential RNA dependent RNA polymerase inhibitors as prospective drugs against COVID-19: an in silico approach.”**

Satabdi saha<sup>1§</sup>, Rajat Nandi<sup>1§</sup>, Poonam Vishwakarma<sup>2</sup>, Amresh Prakash<sup>3</sup> and Diwakar Kumar<sup>1\*</sup>

<sup>1</sup>Department of Microbiology, Assam University, Silchar-788011, Assam, India

<sup>2</sup>School of Computational and Integrative Sciences, Jawaharlal Nehru University, New Delhi-110067

<sup>3</sup>Amity Institute of Integrative Sciences and Health, Amity University Haryana, Gurgaon-122413, India

<sup>§</sup>Equally contributed as the first author

#### **\*Corresponding Author:**

Diwakar Kumar, PhD.,  
Department of Microbiology, Assam University, Silchar-788011, Assam, India  
E-mail: [diwakar11@gmail.com](mailto:diwakar11@gmail.com)  
Tel: +91-8134080245

## Supplementary Tables

**Table S1.** Docking table of the ligands.

| Sl. No. | Name                         | Smiles                                                                                                                                                                                      | PubChem CID | Docking Score |
|---------|------------------------------|---------------------------------------------------------------------------------------------------------------------------------------------------------------------------------------------|-------------|---------------|
| 1       | Saikosaponin A               | <chem>CC1C(C(C(C(O1)OC2CCC3(C(C2(C)CO)CCC4(C3C=CC56C4(CC(C7(C5CC(CC7)(C)C)CO6)O)C)C)C)O)OC8C(C(C(C(O8)CO)O)O)O)O</chem>                                                                     | 167928      | -5.1          |
| 2       | SaikosaponinB2               | <chem>C1C(C(C(C(O1)OC2CCC3(C(C2(C)CO)CCC4(C3C=CC5=C6CC(CCC6(C(CC54C)O)CO)(C)C)C)C)O)OC7C(C(C(C(O7)C)O)O)O)O</chem>                                                                          | 21637642    | -8.9          |
| 3       | Saikosaponin D               | <chem>CC1C(C(C(C(O1)OC2CCC3(C(C2(C)CO)CCC4(C3C=CC56C4(CC(C7(C5CC(CC7)(C)C)CO6)O)C)C)C)O)OC8C(C(C(C(O8)CO)O)O)O)O</chem>                                                                     | 107793      | -9.2          |
| 4       | Amentoflavone                | <chem>C1=CC(=CC=C1C2=CC(=O)C3=C(O2)C(=C(C=C3O)O)C4=C(C=CC(=C4)C5=CC(=O)C6=C(C=C(C=C6O5)O)O)O)O</chem>                                                                                       | 5281600     | -5.1          |
| 5       | Lycorine hydrochloride       | <chem>C1CN2CC3=CC4=C(C=C3C5C2C1=CC(C5O)O)OCO4.Cl</chem>                                                                                                                                     | 164943      | -6.0          |
| 6       | Lycorine                     | <chem>C1CN2CC3=CC4=C(C=C3C5C2C1=CC(C5O)O)OCO4</chem>                                                                                                                                        | 72378       | -5.8          |
| 7       | Scutellarein                 | <chem>C1=CC(=CC=C1C2=CC(=O)C3=C(O2)C=C(C(=C3O)O)O)O</chem>                                                                                                                                  | 5281697     | -7.2          |
| 8       | Scutellarin                  | <chem>C1=CC(=CC=C1C2=CC(=O)C3=C(C(=C(C=C3O2)OC4C(C(C(O4)C(=O)O)O)O)O)O)O)O</chem>                                                                                                           | 185617      | -6.1          |
| 9       | Linalool                     | <chem>CC(=CCCC(C)(C=C)O)C</chem>                                                                                                                                                            | 6549        | -5.8          |
| 10      | Ursolic Acid                 | <chem>CC1CCC2(CCC3(C(=CCC4C3(CCC5C4(CCC(C5(C)C)O)C)C)C2C1C)C)C(=O)O</chem>                                                                                                                  | 64945       | -7.4          |
| 11      | Chebulagic acid              | <chem>C1C2C3C(C(C(O2)OC(=O)C4=CC(=C(C(=C4)O)O)O)OC(=O)C5=CC(=C(C6=C5C(C(C(=O)O3)CC(=O)O)C(C(=O)O6)O)O)OC(=O)C7=CC(=C(C(=C7C8=C(C(=C(C=C8C(=O)O1)O)O)O)O)O)O</chem>                          | 442674      | -5.5          |
| 12      | Raoulic acid                 | <chem>CC(=CCC1CC(CCC2(C(CCC1=C)CC2C(=C)C)C)C(=C)C(=O)O)C</chem>                                                                                                                             | 49771359    | -4.8          |
| 13      | Punicalagin                  | <chem>C1C2C(C3C(C(O2)O)OC(=O)C4=CC(=C(C(=C4C5=C(C(=C(C=C5C(=O)O3)O)O)O)O)O)OC(=O)C6=CC(=C(C(=C6C7=C(C(=C8C9=C7C(=O)OC2=C(C(=C(C3=C(C(=C(C=C3C(=O)O1)O)O)O)C(=C92)C(=O)O8)O)O)O)O)O)O</chem> | 44584733    | -5.2          |
| 14      | Gallic acid                  | <chem>C1=C(C=C(C(=C1O)O)O)C(=O)O</chem>                                                                                                                                                     | 370         | -6.6          |
| 15      | Epigallocatechin             | <chem>C1C(C(OC2=CC(=CC(=C21)O)O)C3=CC(=C(C(=C3)O)O)O)O</chem>                                                                                                                               | 72277       | -7.6          |
| 16      | (-)-Epigallocatechin Gallate | <chem>C1C(C(OC2=CC(=CC(=C21)O)O)C3=CC(=C(C(=C3)O)O)O)OC(=O)C4=CC(=C(C(=C4)O)O)O</chem>                                                                                                      | 65064       | -8.1          |
| 17      | Isochlorogenic acid C        | <chem>C1C(C(C(CC1(C(=O)O)O)OC(=O)C=CC2=CC(=C(C=C2)O)O)OC(=O)C=CC3=CC(=C(C=C3)O)O)O</chem>                                                                                                   | 6474309     | -5.3          |

|    |                     |                                                                                                                                                                                                                                                                                                                     |           |      |
|----|---------------------|---------------------------------------------------------------------------------------------------------------------------------------------------------------------------------------------------------------------------------------------------------------------------------------------------------------------|-----------|------|
| 18 | Apigenin            | <chem>C1=CC(=CC=C1C2=CC(=O)C3=C(C=C(C=C3O2)O)O)O</chem>                                                                                                                                                                                                                                                             | 5280443   | -5.6 |
| 19 | Quercetin           | <chem>C1=CC(=C(C=C1C2=C(C(=O)C3=C(C=C(C=C3O2)O)O)O)O)O</chem>                                                                                                                                                                                                                                                       | 5280343   | -6.2 |
| 20 | Narasin             | <chem>CCC(C1C(CC(C(O1)C(C)C(C(C)C(=O)C(CC)C2C(CC(C3(O2)C=CC(C4(O3)CCC(O4)(C)C5CCC(C(O5)C)(CC)O)O)C)C)O)C)C(=O)O</chem>                                                                                                                                                                                              | 65452     | -5.1 |
| 21 | Naringin            | <chem>CC1C(C(C(C(O1)OC2C(C(C(OC2OC3=CC(=C4C(=O)CC(OC4=C3)C5=CC=C(C=C5)O)O)CO)O)O)O)O)O</chem>                                                                                                                                                                                                                       | 442428    | -7.7 |
| 22 | Silymarin           | <chem>COC1=C(C=CC(=C1)C2C(OC3=C(O2)C=C(C=C3)C4C(C(=O)C5=C(C=C(C=C5O4)O)O)O)CO)O</chem>                                                                                                                                                                                                                              | 7073228   | -5.7 |
| 23 | Ladanein            | <chem>COC1=CC=C(C=C1)C2=CC(=O)C3=C(C(=C(C=C3O2)OC)O)O</chem>                                                                                                                                                                                                                                                        | 3084066   | -4.2 |
| 24 | Tellimagrandin I    | <chem>C1C2C(C(C(C(O2)O)OC(=O)C3=CC(=C(C(=C3)O)O)O)OC(=O)C4=CC(=C(C(=C4)O)O)O)OC(=O)C5=CC(=C(C(=C5C6=C(C(=C(C=C6C(=O)O1)O)O)O)O)O)O</chem>                                                                                                                                                                           | 442690    | -9.6 |
| 25 | Hippomanin A        | <chem>C1C2C(C(C(C(O2)O)OC(=O)C3=CC(=C(C(=C3)O)O)O)O)O)C(=O)C4=CC(=C(C(=C4C5=C(C(=C(C=C5C(=O)O1)O)O)O)O)O)O</chem>                                                                                                                                                                                                   | 323958    | -5.2 |
| 26 | Geraniin            | <chem>C1C2C3C(C(C(O2)OC(=O)C4=CC(=C(C(=C4)O)O)O)OC(=O)C5=CC(=C(C6=C5C7C(=CC(=O)C(C7(O)O)(O6)O)C(=O)O3)O)O)OC(=O)C8=CC(=C(C(=C8C9=C(C(=C(C=C9C(=O)O1)O)O)O)O)O)O</chem>                                                                                                                                              | 3001497   | -7.8 |
| 27 | Excoecarianin       | <chem>C1C2C3C(C(C(O2)OC(=O)C4=CC(=C(C(=C4)O)O)O)OC(=O)C5=CC(=C(C6=C5C7C(=CC(=O)C(C7(O)O)(O6)O)C(=O)O3)O)O)OC(=O)C8=C(C(=C(C(=C8)C9=C(C(=C(C=C9C(=O)O1)OC1=C(C(=C(C=C1C(=O)OC1C2C(C(COC(=O)C3=CC(=C(C(=C3C3=C(C(=C(C=C3C(=O)O2)O)O)O)O)O)OC1OC(=O)C1=CC(=C(C(=C1)O)O)O)OC(=O)C1=CC(=C(C(=C1)O)O)O)O)O)O)O)O)O</chem> | 49774003  | -8.1 |
| 28 | Procyanidin         | <chem>C1C(C(OC2=CC(=CC(=C21)O)O)C3=CC(=C(C=C3)O)O)OC4(C(C(C5=C(C=C(C=C5O4)O)O)O)O)O)C6=CC(=C(C=C6)O)O</chem>                                                                                                                                                                                                        | 107876    | -5.4 |
| 29 | Proanthocyanidin    | <chem>COC1=C(C=C(C=C1O)C2C(CC3=C(O2)C(=C(C=C3O)O)C4C(C(OC5=CC(=CC(=C45)O)O)C6=CC=C(C=C6)O)O)O)O</chem>                                                                                                                                                                                                              | 108065    | -6.3 |
| 30 | Glucoveatromonoxide | <chem>CC1C(C(CC(O1)OC2CCC3(C(C2)CCC4C3CCC5(C4(CCC5C6=CC(=O)OC6)O)C)O)OC7C(C(C(C(O7)CO)O)O)O</chem>                                                                                                                                                                                                                  | 15137997  | -7.2 |
| 31 | Coumarin            | <chem>C1=CC=C2C(=C1)C=CC(=O)O2</chem>                                                                                                                                                                                                                                                                               | 323       | -8.1 |
| 32 | Spirolactone        | <chem>CC(=O)SC1CC2=CC(=O)CCC2(C3C1C4CCC5(C4(CC3)C)C(C(=O)O5)C</chem>                                                                                                                                                                                                                                                | 5833      | -7.8 |
| 33 | Spirooliganone B    | <chem>CC(C)C12CCC3(C1C2)CCC4=C(O3)C5(CC(C(O5)(C)C)O)C=C(C4=O)CC=C</chem>                                                                                                                                                                                                                                            | 122396353 | -7.5 |
| 34 | Chalcone            | <chem>C1=CC=C(C=C1)C=CC(=O)C2=CC=CC=C2</chem>                                                                                                                                                                                                                                                                       | 637760    | -6.6 |
| 35 | Licochalcone A      | <chem>CC(C)(C=C)C1=C(C=C(C(=C1)C=CC(=O)C2=CC=C(C=C2)O)OC)O</chem>                                                                                                                                                                                                                                                   | 5318998   | -7.8 |
| 36 | Uncinoside A        | <chem>CC1=CC(=O)C2=C(O1)C(=C(C(=C2O)C)OC3C(C(C(C(O3)CO)O)O)O)C</chem>                                                                                                                                                                                                                                               | 10022766  | -7.4 |
| 37 | Uncinoside B        | <chem>CC1=CC(=O)C2=C(C(=C(C(=C2O1)C)OC3C(C(C(C(O3)CO)O)O)C)OC(=O)C</chem>                                                                                                                                                                                                                                           | 11743072  | -5.8 |

|    |               |                                                                                                                                           |           |      |
|----|---------------|-------------------------------------------------------------------------------------------------------------------------------------------|-----------|------|
| 38 | Genkwanol B   | <chem>C1C(C(OC2=C1C(=O)C=C3C24C(C(O3)C5=CC=C(C=C5)O)(C(=O)C6=C(C=C(C=C6O4)O)O)O)C7=CC=C(C=C7)O)O</chem>                                   | 15735849  | -6.7 |
| 39 | Genkwanol C   | <chem>C1C(C(OC2=C1C(=O)C=C3C24C(C(O3)C5=CC=C(C=C5)O)(C(=O)C6=C(C=C(C=C6O4)O)O)O)C7=CC=C(C=C7)O)O</chem>                                   | 131676073 | -7.2 |
| 40 | Cimifugin     | <chem>CC(C)(C1CC2=C(O1)C=C3C(=C2OC)C(=O)C=C(O3)CO)O</chem>                                                                                | 441960    | -6.4 |
| 41 | Butein        | <chem>C1=CC(=C(C=C1C=CC(=O)C2=C(C=C(C=C2)O)O)O)O</chem>                                                                                   | 5281222   | -5.4 |
| 42 | Fustin        | <chem>C1=CC(=C(C=C1C2C(C(=O)C3=C(O2)C=C(C=C3)O)O)O)O</chem>                                                                               | 5317435   | -4.8 |
| 43 | Morin         | <chem>C1=CC(=C(C=C1O)O)C2=C(C(=O)C3=C(C=C(C=C3O2)O)O)O</chem>                                                                             | 5281670   | -6.7 |
| 44 | Galangin      | <chem>C1=CC=C(C=C1)C2=C(C(=O)C3=C(C=C(C=C3O2)O)O)O</chem>                                                                                 | 5281616   | -4.3 |
| 45 | Hispidulin    | <chem>COC1=C(C2=C(C=C1O)OC(=CC2=O)C3=CC=C(C=C3)O)O</chem>                                                                                 | 5281628   | -6.3 |
| 46 | Luteolin      | <chem>C1=CC(=C(C=C1C2=CC(=O)C3=C(C=C(C=C3O2)O)O)O)O</chem>                                                                                | 5280445   | -4.8 |
| 47 | Paeonol       | <chem>CC(=O)C1=C(C=C(C=C1)OC)O</chem>                                                                                                     | 11092     | -5.7 |
| 48 | Syringic acid | <chem>COC1=CC(=CC(=C1O)OC)C(=O)O</chem>                                                                                                   | 10742     | -7.0 |
| 49 | Piceatannol   | <chem>C1=CC(=C(C=C1C=CC2=CC(=CC(=C2)O)O)O)O</chem>                                                                                        | 667639    | -4.2 |
| 50 | Danshensu     | <chem>C1=CC(=C(C=C1CC(C(=O)O)O)O)O</chem>                                                                                                 | 11600642  | -6.9 |
| 51 | Pinobanksin   | <chem>C1=CC=C(C=C1)C2C(C(=O)C3=C(C=C(C=C3O2)O)O)O</chem>                                                                                  | 73202     | -3-2 |
| 52 | Ferulic acid  | <chem>COC1=C(C=CC(=C1)C=CC(=O)O)O</chem>                                                                                                  | 445858    | -6.5 |
| 53 | Pyrogallol    | <chem>C1=CC(=C(C(=C1)O)O)O</chem>                                                                                                         | 1057      | -4-8 |
| 54 | Nobiletin     | <chem>COC1=C(C=C(C=C1)C2=CC(=O)C3=C(O2)C=C(C(=C3OC)OC)OC)OC</chem>                                                                        | 72344     | -7.1 |
| 55 | Purpurin      | <chem>C1=CC=C2C(=C1)C(=O)C3=C(C2=O)C(=C(C=C3O)O)O</chem>                                                                                  | 6683      | -4.8 |
| 56 | Gossypetin    | <chem>C1=CC(=C(C=C1C2=C(C(=O)C3=C(O2)C=C(C=C3O)O)O)O)O</chem>                                                                             | 5280647   | -6.2 |
| 57 | Tangeritin    | <chem>COC1=CC=C(C=C1)C2=CC(=O)C3=C(O2)C=C(C(=C3OC)OC)OC</chem>                                                                            | 68077     | -4.5 |
| 58 | Peonidin      | <chem>COC1=C(C=CC(=C1)C2=[O+]C3=CC(=CC(=C3C=C2O)O)O)O</chem>                                                                              | 441773    | -6.5 |
| 59 | Wogonin       | <chem>COC1=C(C=C(C2=C1OC(=CC2=O)C3=CC=CC=C3)O)O</chem>                                                                                    | 5281703   | -4.2 |
| 60 | Pendunculagin | <chem>C1C2C(C3C(C(O2)O)OC(=O)C4=CC(=C(C(=C4C5=C(C(=C(C=C5C(=O)O3)O)O)O)O)OC(=O)C6=CC(=C(C(=C6C7=C(C=C(C=C7C(=O)O1)O)O)O)O)O)O</chem>      | 442688    | -5.2 |
| 61 | Punigluconin  | <chem>C1C(C(OC(=O)C2=CC(=C(C(=C2C3=C(C(=C(C=C3C(=O)O1)O)O)O)O)O)C(C(C(=O)O)OC(=O)C4=CC(=C(C(=C4)O)O)O)OC(=O)C5=CC(=C(C(=C5)O)O)O)O</chem> | 21637585  | -4.3 |

|    |                   |                                                                                                                                                                                                                                                                                                                                  |           |      |
|----|-------------------|----------------------------------------------------------------------------------------------------------------------------------------------------------------------------------------------------------------------------------------------------------------------------------------------------------------------------------|-----------|------|
| 62 | Tellimagrandin II | <chem>C1C2C(C(C(C(O2)OC(=O)C3=CC(=C(C(=C3)O)O)O)OC(=O)C4=CC(=C(C(=C4)O)O)O)OC(=O)C5=CC(=C(C(=C5)O)O)O)OC(=O)C6=CC(=C(C(=C6C7=C(C(=C(C=C7C(=O)O1)O)O)O)O)O)O</chem>                                                                                                                                                               | 151590    | -5.2 |
| 63 | Castalagin        | <chem>C1C2C(C3C4C(C5=C(C(=C(C(=C5C(=O)O4)C6=C(C(=C(C(=C6C(=O)O3)C7=C(C(=C(C(=C7C(=O)O2)O)O)O)O)O)O)O)O)O)OC(=O)C8=CC(=C(C(=C8C9=C(C(=C(C(=C9C(=O)O1)O)O)O)O)O)O</chem>                                                                                                                                                           | 168165    | -4.8 |
| 64 | Terflavin B       | <chem>C1=C(C=C(C(=C1O)O)O)C(=O)OCC2C(C(C(C(O2)O)O)O)OC(=O)C3=CC(=C(C(=C3C4=C(C(=C5C6=C4C(=O)OC7=C6C(=CC(=C7O)O)C(=O)O5)O)O)O)O)O</chem>                                                                                                                                                                                          | 44584734  | -6.7 |
| 65 | Roburin A         | <chem>C1C2C(C3C4C(C5=C(C(=C(C(=C5C(=O)O4)C6=C(C(=C(C(=C6C(=O)O3)C7=C(C(=C(C(=C7C(=O)O2)O)O)O)O)O)O)O)O)O)O)C8=C(C(=C(C9=C8C(=O)OCC2C(C3C4C(C5=C(C(=C(C(=C5C(=O)O4)C4=C(C(=C(C(=C4C(=O)O3)C3=C(C(=C(C(=C3C(=O)O2)O)O)O)O)O)O)O)O)O)O)OC(=O)C2=CC(=C(C(=C29)O)O)O)O)O)OC(=O)C2=CC(=C(C(=C2C2=C(C(=C(C=C2C(=O)O1)O)O)O)O)O)O</chem> | 101670390 | -5.8 |
| 66 | Vescalagin        | <chem>C1C2C(C3C4C(C5=C(C(=C(C(=C5C(=O)O4)C6=C(C(=C(C(=C6C(=O)O3)C7=C(C(=C(C(=C7C(=O)O2)O)O)O)O)O)O)O)O)O)OC(=O)C8=CC(=C(C(=C8C9=C(C(=C(C(=C9C(=O)O1)O)O)O)O)O</chem>                                                                                                                                                             | 168165    | -4.3 |
| 67 | Castalin          | <chem>C1=C2C(=C(C(=C1O)O)O)C3=C4C(=C(C(=C3O)O)O)C5=C6C(=C(C(=C5O)O)O)C(C(C(C(C(OC2=O)CO)O)OC4=O)OC6=O)O</chem>                                                                                                                                                                                                                   | 99973     | -5.6 |
| 68 | Casuarinin        | <chem>C1C(C(OC(=O)C2=CC(=C(C(=C2C3=C(C(=C(C(=C3C(=O)O1)O)O)O)O)O)O)C4C5C(C6=C(C(=C(C(=C6C(=O)O5)C7=C(C(=C(C(=C7C(=O)O4)O)O)O)O)O)O)O)OC(=O)C8=CC(=C(C(=C8)O)O)O</chem>                                                                                                                                                           | 442673    | -6.1 |
| 69 | Grandinin         | <chem>C1C2C(C3C4C(C5=C(C(=C(C(=C5C(=O)O4)C6=C(C(=C(C(=C6C(=O)O3)C7=C(C(=C(C(=C7C(=O)O2)O)O)O)O)O)O)O)O)O)C8(C(C(C(O8)CO)O)O)O)OC(=O)C9=CC(=C(C(=C9C2=C(C(=C(C(=C2C(=O)O1)O)O)O)O)O)O</chem>                                                                                                                                      | 492392    | -5.8 |
| 70 | Rosmarinic acid   | <chem>C1=CC(=C(C=C1CC(C(=O)O)OC(=O)C=CC2=CC(=C(C=C2)O)O)O)O</chem>                                                                                                                                                                                                                                                               | 5281792   | -4.5 |
| 71 | Ellagic acid      | <chem>C1=C2C3=C(C(=C1O)O)OC(=O)C4=CC(=C(C(=C43)OC2=O)O)O</chem>                                                                                                                                                                                                                                                                  | 5281855   | -3.2 |
| 72 | Punicalin         | <chem>C1C2C(C(C(C(O2)O)O)O)OC(=O)C3=CC(=C(C(=C3C4=C(C(=C5C6=C4C(=O)OC7=C(C(=C(C8=C(C(=C(C(=C8C(=O)O1)O)O)O)C(=C67)C(=O)O5)O)O)O)O)O)O</chem>                                                                                                                                                                                     | 5388496   | -5.6 |
| 73 | Daidzein          | <chem>C1=CC(=CC=C1C2=COC3=C(C2=O)C=CC(=C3)O)O</chem>                                                                                                                                                                                                                                                                             | 5281708   | -7.6 |
| 74 | Equol             | <chem>C1C(COC2=C1C=CC(=C2)O)C3=CC=C(C=C3)O</chem>                                                                                                                                                                                                                                                                                | 91469     | -6.1 |

|    |                        |                                                                                                                                                                                                                                                                                                                                                                                                                           |          |      |
|----|------------------------|---------------------------------------------------------------------------------------------------------------------------------------------------------------------------------------------------------------------------------------------------------------------------------------------------------------------------------------------------------------------------------------------------------------------------|----------|------|
| 75 | Raspberry ellagitannin | <chem>C1C2C(C3C(C(O2)OC4=C(C(=C(C5=C4C(=O)OC6C(COC(=O)C7=CC(=C(C(=C75)O)O)O)OC(C8C6OC(=O)C9=CC(=C(C(=C9C2=C(C(=C(C=C2C(=O)O8)O)O)O)O)OC(=O)C2=CC(=C(C(=C2)OC2=C(C(=C(C4=C2C(=O)OC2C(COC(=O)C5=CC(=C(C(=C54)O)O)O)OC(C4C2OC(=O)C2=CC(=C(C(=C2C2=C(C(=C(C=C2C(=O)O4)O)O)O)O)OC(=O)C2=CC(=C(C(=C2)O)O)O)O)O)O)OC(=O)C2=CC(=C(C(=C2C2=C(C(=C(C=C2C(=O)O3)O)O)O)O)OC(=O)C2=C(C(=C(C=C2C2=C(C(=C(C=C2C(=O)O1)O)O)O)O)O)O</chem> | 71308261 | -6.2 |
| 76 | Sarracine              | <chem>CC=C(C)C(=O)OC1CCN2C1C(CC2)COC(=O)C(=CC)CO</chem>                                                                                                                                                                                                                                                                                                                                                                   | 5281746  | -5.2 |
| 77 | Matairesinol           | <chem>COC1=C(C=CC(=C1)CC2COC(=O)C2CC3=CC(=C(C=C3)O)OC)O</chem>                                                                                                                                                                                                                                                                                                                                                            | 119205   | -6.2 |
| 78 | Narciclasine           | <chem>C1OC2=C(O1)C(=C3C(=C2)C4=CC(C(C(C4NC3=O)O)O)O)O</chem>                                                                                                                                                                                                                                                                                                                                                              | 72376    | -5.4 |
| 79 | Houttuynoid A          | <chem>CCCCCCCCC1=C(C2=C(C=CC(=C2O1)O)C3=C(C(=O)C4=C(C=C(C=C4O3)O)O)OC5C(C(C(C(O5)CO)O)O)O)C=O</chem>                                                                                                                                                                                                                                                                                                                      | 57412149 | -8.2 |
| 80 | Houttuynoid B          | <chem>CCCCCCCCC1=CC2=C(C=CC(=C2O1)O)C3=C(C(=O)C4=C(C=C(C=C4O3)O)O)OC5C(C(C(C(O5)CO)O)O)O</chem>                                                                                                                                                                                                                                                                                                                           | 57412150 | -6.3 |
| 81 | Houttuynoid C          | <chem>CCCCCCCCC(=O)C1=COC2=C(C=CC(=C12)C3=C(C(=O)C4=C(C=C(C=C4O3)O)O)OC5C(C(C(C(O5)CO)O)O)O)O</chem>                                                                                                                                                                                                                                                                                                                      | 57412151 | -4.8 |
| 82 | Houttuynoid D          | <chem>CCCCCCCCC(=O)CC1=C(C=CC(=C1O)O)C2=C(C(=O)C3=C(C=C(C=C3O2)O)O)OC4C(C(C(C(O4)CO)O)O)O</chem>                                                                                                                                                                                                                                                                                                                          | 57412152 | -5.2 |
| 83 | Houttuynoid E          | <chem>CCCCCCCCC(=O)CC1=CC(=C(C=C1C2=C(C(=O)C3=C(C=C(C=C3O2)O)O)OC4C(C(C(C(O4)CO)O)O)O)O)O</chem>                                                                                                                                                                                                                                                                                                                          | 57412153 | -4.7 |
| 84 | Hesperidin             | <chem>CC1C(C(C(C(O1)OCC2C(C(C(C(O2)OC3=CC(=C4C(=O)CC(OC4=C3)C5=CC(=C(C=C5)OC)O)O)O)O)O)O)O</chem>                                                                                                                                                                                                                                                                                                                         | 10621    | -8.6 |
| 85 | Melittin               | <chem>CCC(C)C(C(=O)NCC(=O)NC(C)C(=O)NC(C(C)C)C(=O)NC(CC(C)C)C(=O)NC(CCCCN)C(=O)NC(C(C)C)C(=O)NC(CC(C)C)C(=O)NC(C(C)O)C(=O)NC(C(C)O)C(=O)NCC(=O)NC(C(C)C)C(=O)N1CCCC1C(=O)NC(C)C(=O)NC(CC(C)C)C(=O)NC(C(C)CC)C(=O)NC(CO)C(=O)NC(CC2=CNC3=CC=CC=C32)C(=O)NC(C(C)CC)C(=O)NC(CCCCN)C(=O)NC(CCCN C(=N)N)C(=O)NC(CCCCN)C(=O)NC(CCCNC(=N)N)C(=O)NC(CCC(=O)N)C(=O)NC(CCC(=O)N)C(=O)N)NC(=O)CN</chem>                              | 16133648 | -6.3 |
| 86 | Licoisoflavanone       | <chem>CC1(C=CC2=C(O1)C=CC(=C2O)C3COC4=CC(=CC(=C4C3=O)O)O)C</chem>                                                                                                                                                                                                                                                                                                                                                         | 392443   | -4.8 |
| 87 | Glisoflavanone         | <chem>CC(=CCC1=C(C=CC(=C1O)C2COC3=C(C2=O)C(=C(C(=C3)O)CC=C(C)C)O)O)C</chem>                                                                                                                                                                                                                                                                                                                                               | 480786   | -6.7 |
| 88 | Parvisoflavanone       | <chem>COC1=C(C=CC(=C1OC)O)C2COC3=CC(=CC(=C3C2=O)O)O</chem>                                                                                                                                                                                                                                                                                                                                                                | 44257394 | -4.7 |
| 89 | Sophoraisoflavanone A  | <chem>CC(=CCC1=C(C=CC(=C1OC)C2COC3=CC(=CC(=C3C2=O)O)O)O)C</chem>                                                                                                                                                                                                                                                                                                                                                          | 442822   | -5.6 |
| 90 | Isohomosovanillic acid | <chem>COC1=C(C=C(C=C1)CC(=O)O)O</chem>                                                                                                                                                                                                                                                                                                                                                                                    | 160562   | -7.8 |

|     |                  |                                                                            |           |      |
|-----|------------------|----------------------------------------------------------------------------|-----------|------|
| 91  | Spirooliganone A | <chem>CC(C)C12CCC3(C1C2)CCC4=C(O3)C5(CC(C(O5)(C)C)O)C=C(C4=O)CC=C</chem>   | 72946626  | -6.7 |
| 92  | Spirooliganone 3 | <chem>CC(C)C12CCC3(C1C2)CCC4=C(O3)C5(CC(C(O5)(C)C)O)C=C(C4=O)CC=C</chem>   | 122396353 | -6.1 |
| 93  | Spirooliganone 6 | <chem>CC(C)C12CCC3(C1C2)CCC4=C(O3)C5(CC(C(O5)(C)C)O)C=C(C4=O)CC=C</chem>   | 122396356 | -4.5 |
| 94  | Spirooliganone 7 | <chem>CC(C)C12CCC3(C1C2)CCC4=C(O3)C5(CC(C(O5)(C)C)O)C=C(C4=O)CC=C</chem>   | 122396357 | -5.0 |
| 95  | Spirooliganone 8 | <chem>CC(C)C12CCC3(C1C2)CCC4=C(O3)C5(CC(C(O5)(C)C)O)C=C(C4=O)CC=C</chem>   | 122396358 | -6.6 |
| 96  | Spirooliganone 4 | <chem>CC(C)C12CCC3(C1C2)CCC4=C(O3)C5(CC(C(O5)(C)C)O)C=C(C4=O)CC=C</chem>   | 122396354 | -5.4 |
| 97  | Spirooliganone 5 | <chem>CC(C)C12CCC3(C1C2)CCC4=C(O3)C5(CC(C(O5)(C)C)O)C=C(C4=O)CC=C</chem>   | 122396355 | -6.1 |
| 98  | Herbacetin       | <chem>C1=CC(=CC=C1C2=C(C(=O)C3=C(O2)C(=C(C=C3O)O)O)O</chem>                | 5280544   | -4.8 |
| 99  | Myricetin        | <chem>C1=C(C=C(C(=C1O)O)O)C2=C(C(=O)C3=C(C=C(C=C3O2)O)O)O</chem>           | 5281672   | -3.8 |
| 100 | Formononetin     | <chem>COC1=CC=C(C=C1)C2=COC3=C(C2=O)C=CC(=C3)O</chem>                      | 5280378   | -7.2 |
| 101 | Quercetagetin    | <chem>C1=CC(=C(C=C1C2=C(C(=O)C3=C(O2)C=C(C(=C3O)O)O)O)O</chem>             | 5281680   | -7.0 |
| 102 | Chrysin          | <chem>C1=CC=C(C=C1)C2=CC(=O)C3=C(C=C(C=C3O2)O)O</chem>                     | 5281607   | -5.6 |
| 103 | Sinapic acid     | <chem>COC1=CC(=CC(=C1O)OC)C=CC(=O)O</chem>                                 | 637775    | -4.5 |
| 104 | Rhapontigenin    | <chem>COC1=C(C=C(C=C1)C=CC2=CC(=CC(=C2)O)O)O</chem>                        | 5320954   | -4.1 |
| 105 | Pinosylvin       | <chem>C1=CC=C(C=C1)C=CC2=CC(=CC(=C2)O)O</chem>                             | 5280457   | -4.6 |
| 106 | Caffeic acid     | <chem>C1=CC(=C(C=C1C=CC(=O)O)O)O</chem>                                    | 689043    | -6.7 |
| 107 | Baicalein        | <chem>C1=CC=C(C=C1)C2=CC(=O)C3=C(O2)C=C(C(=C3O)O)O</chem>                  | 5281605   | -6.6 |
| 108 | Vanillin         | <chem>COC1=C(C=CC(=C1)C=O)O</chem>                                         | 1183      | -4.6 |
| 109 | Isoferulic acid  | <chem>COC1=C(C=C(C=C1)C=CC(=O)O)O</chem>                                   | 736186    | -5.2 |
| 110 | Irilone          | <chem>C1OC2=C(O1)C(=C3C(=C2)OC=C(C3=O)C4=CC=C(C=C4)O)O</chem>              | 5281779   | -6.7 |
| 112 | Kaempferol       | <chem>C1=CC(=CC=C1C2=C(C(=O)C3=C(C=C(C=C3O2)O)O)O)O</chem>                 | 5280863   | -7.1 |
| 113 | Coumestrol       | <chem>C1=CC2=C(C=C1O)OC3=C2C(=O)OC4=C3C=CC(=C4)O</chem>                    | 5281707   | -7.0 |
| 114 | Pratensein       | <chem>COC1=C(C=C(C=C1)C2=COC3=CC(=CC(=C3C2=O)O)O)O</chem>                  | 5281803   | -6.1 |
| 115 | Isosakuranetin   | <chem>COC1=CC=C(C=C1)C2CC(=O)C3=C(C=C(C=C3O2)O)O</chem>                    | 160481    | -4.1 |
| 116 | Alpinetin        | <chem>COC1=CC(=CC2=C1C(=O)CC(O2)C3=CC=CC=C3)O</chem>                       | 154279    | -5.2 |
| 117 | Sugiol           | <chem>CC(C)C1=C(C=C2C(=C1)C(=O)CC3C2(CCCC3(C)C)C)O</chem>                  | 94162     | -5.3 |
| 118 | Betulonic acid   | <chem>CC(=C)C1CCC2(C1C3CCC4C5(CCC(=O)C(C5CCC4(C3(CC2)C)C(C)C)C(=O)O</chem> | 122844    | -6.7 |
| 119 | Savinin          | <chem>C1C(C(=CC2=CC3=C(C=C2)OCO3)C(=O)O1)CC4=CC5=C(C=C4)OCO5</chem>        | 5281867   | -3.4 |
| 120 | Xanthoangelol E  | <chem>CC(=C)C(CC1=C(C=CC(=C1O)C(=O)C=CC2=CC=C(C=C2)O)OC)OO</chem>          | 10022050  | -5.4 |
| 121 | Bavachinin       | <chem>CC(=CCC1=CC2=C(C=C1OC)OC(CC2=O)C3=CC=C(C=C3)O)C</chem>               | 10337211  | -4.5 |

|     |                                     |                                                                                                                                      |           |      |
|-----|-------------------------------------|--------------------------------------------------------------------------------------------------------------------------------------|-----------|------|
| 122 | Neobavaisoflavone                   | <chem>CC(=CCC1=C(C=CC(=C1)C2=COC3=C(C2=O)C=CC(=C3)O)O)C</chem>                                                                       | 5320053   | -5.2 |
| 123 | Isobavachalcone                     | <chem>CC(=CCC1=C(C=CC(=C1O)C(=O)C=CC2=CC=C(C=C2)O)O)C</chem>                                                                         | 5281255   | -4.6 |
| 124 | 4'-O-methylbavachalcone             | <chem>CC(=CCC1=CC(=C(C=C1OC)O)C(=O)C=CC2=CC=C(C=C2)OC)C</chem>                                                                       | 42607530  | -5.2 |
| 125 | Psoralidin                          | <chem>CC(=CCC1=CC2=C(C=C1O)OC(=O)C3=C2OC4=C3C=CC(=C4)O)C</chem>                                                                      | 5281806   | -5.4 |
| 126 | Corylifol                           | <chem>CC(=CCC1=C(C=CC(=C1O)C(=O)C=CC2=CC(=C(C=C2)O)O)O)C</chem>                                                                      | 10472405  | -6.2 |
| 127 | Pectolarin                          | <chem>CC1C(C(C(C(O1)OCC2C(C(C(C(O2)OC3=C(C(=C4C(=C3)OC(=CC4=O)C5=CC=C(C=C5)OC)O)OC)O)O)O)O)O)O</chem>                                | 168849    | -7.3 |
| 128 | Rhoifolin                           | <chem>CC1C(C(C(C(O1)OC2C(C(C(OC2OC3=CC(=C4C(=C3)OC(=CC4=O)C5=CC=C(C=C5)O)O)CO)O)O)O)O)O</chem>                                       | 5282150   | -6.1 |
| 129 | Herbacetin7                         | <chem>C1=CC(=CC=C1C2=C(C(=O)C3=C(O2)C(=C(C=C3O)OC4C(C(C(O4)CO)O)O)O)O)O</chem>                                                       | 44259932  | -6.0 |
| 130 | Helichrysetin                       | <chem>COC1=CC(=CC(=C1C(=O)C=CC2=CC=C(C=C2)O)O)O</chem>                                                                               | 6253344   | -4.8 |
| 131 | Amemtoflavone                       | <chem>C1=CC(=CC=C1C2=CC(=O)C3=C(O2)C(=C(C=C3O)O)C4=C(C=CC(=C4)C5=CC(=O)C6=C(C=C(C=C6O5)O)O)O)O</chem>                                | 5281600   | -5.6 |
| 132 | Juglanin                            | <chem>C1=CC(=CC=C1C2=C(C(=O)C3=C(C=C(C=C3O2)O)O)OC4C(C(C(O4)CO)O)O)O</chem>                                                          | 5318717   | -3.7 |
| 133 | Juglanin B                          | <chem>COC1=CC2=CC(=C1O)C3=C(C=CC(=C3)CCC(CCCC2)O)O</chem>                                                                            | 44155973  | -4.1 |
| 134 | Glycyrrhizin                        | <chem>CC1(C2CCC3(C(C2(CCC1OC4C(C(C(O4)C(=O)O)O)O)OC5C(C(C(C(O5)C(=O)O)O)O)O)C(=O)C=C6C3(CCC7(C6CC(C7)C)C(=O)O)C)C)C</chem>           | 14982     | -5.2 |
| 135 | Indirubin                           | <chem>C1=CC=C2C(=C1)C(=C(N2)O)C3=NC4=CC=CC=C4C3=O</chem>                                                                             | 10177     | -4.5 |
| 136 | Indican                             | <chem>C1=CC=C2C(=C1)C(=CN2)OC3C(C(C(O3)CO)O)O)O</chem>                                                                               | 441564    | -3.2 |
| 137 | Sinigrin                            | <chem>C=CCC(=NOS(=O)(=O)[O-])SC1C(C(C(O1)CO)O)O.[K+]</chem>                                                                          | 23682211  | -4.5 |
| 138 | $\beta$ -sitosterol                 | <chem>CCC(CCC(C)C1CCC2C1(CCC3C2CC=C4C3(CCC(C4)O)C)C)C(C)C</chem>                                                                     | 222284    | -6.5 |
| 139 | Aloeemodin                          | <chem>C1=CC2=C(C(=C1)O)C(=O)C3=C(C2=O)C=C(C=C3O)CO</chem>                                                                            | 10207     | -3.2 |
| 140 | Justicidin A                        | <chem>COC1=C(C=C2C(=C1)C(=C3C(=C2OC)COC3=O)C4=CC5=C(C=C4)OC5)OC</chem>                                                               | 159982    | -4.0 |
| 141 | Tetrandrine                         | <chem>CN1CCC2=CC(=C3C=C2C1CC4=CC=C(C=C4)OC5=C(C=C(C=C5)CC6C7=C(O3)C(=C(C=C7CCN6C)OC)OC)OC)OC</chem>                                  | 73078     | -4.1 |
| 142 | Fangchinoline                       | <chem>CN1CCC2=CC(=C3C=C2C1CC4=CC=C(C=C4)OC5=C(C=C(C=C5)CC6C7=C(O3)C(=C(C=C7CCN6C)OC)O)OC)OC</chem>                                   | 73481     | -5.2 |
| 143 | Cepharanthine                       | <chem>CN1CCC2=CC3=C(C4=C2C1CC5=CC=C(C=C5)OC6=C(C=C(C=C6)CC7C8=CC(=C(C=C8CCN7C)OC)O4)OC)OC3</chem>                                    | 10206     | -6.1 |
| 145 | Emodin                              | <chem>CC1=CC2=C(C(=C1)O)C(=O)C3=C(C2=O)C=C(C=C3O)O</chem>                                                                            | 3220      | -5.1 |
| 146 | Tetra-O-galloyl- $\beta$ -D-glucose | <chem>C1=C(C=C(C(=C1O)O)O)C(=O)OCC(C(C(C(=O)OC(=O)C2=CC(=C(C(=C2)O)O)O)OC(=O)C3=CC(=C(C(=C3)O)O)O)C(=O)C4=CC(=C(C(=C4)O)O)O)O</chem> | 101011018 | -4.9 |
| 147 | Tylophorinine                       | <chem>COC1=CC2=C(C=C1)C3=C(CN4CCCC4C3O)C5=CC(=C(C=C52)OC)OC</chem>                                                                   | 264751    | -6.1 |
| 148 | Tylophorine N-oxide                 | <chem>COC1=C(C=C2C(=C1)C3=C(C[N+](C4CCCC4C3)[O-])C5=CC(=C(C=C52)OC)OC)OC</chem>                                                      | 10525573  | -4.5 |
| 149 | Tanshinone IIA                      | <chem>CC1=COC2=C1C(=O)C(=O)C3=C2C=CC4=C3CCCC4(C)C</chem>                                                                             | 164676    | -3.2 |
| 150 | Tanshinone IIB                      | <chem>CC1=COC2=C1C(=O)C(=O)C3=C2C=CC4=C3CCCC4(C)CO</chem>                                                                            | 9926694   | -5.4 |



|     |                               |                                                                                                      |          |      |
|-----|-------------------------------|------------------------------------------------------------------------------------------------------|----------|------|
| 151 | Cryptotanshinone              | <chem>CC1COC2=C1C(=O)C(=O)C3=C2C=CC4=C3CCCC4(C)C</chem>                                              | 160254   | -4.5 |
| 152 | Rosmariquinone                | <chem>CC(C)C1=CC2=C(C3=C(C=C2)C(CCC3)(C)C)C(=O)C1=O</chem>                                           | 160142   | -3.2 |
| 153 | oleuropein                    | <chem>CC=C1C(C(=COC1OC2C(C(C(C(O2)CO)O)O)O)C(=O)OC)C(=O)OCCC3=CC(=C(C=C3)O)O</chem>                  | 5281544  | -5.6 |
| 154 | Cianidanol                    | <chem>C1C(C(OC2=CC(=CC(=C2)O)O)C3=CC(=C(C=C3)O)O)O</chem>                                            | 9064     | -6.1 |
| 155 | Kaempferol 3,7-diglucoside    | <chem>C1=CC(=CC=C1C2=C(C(=O)C3=C(C=C(C=C3O2)OC4C(C(C(C(O4)CO)O)O)O)OC5C(C(C(C(O5)CO)O)O)O)O)O</chem> | 6325460  | -6.7 |
| 156 | baicalin                      | <chem>C1=CC=C(C=C1)C2=CC(=O)C3=C(C(=C(C=C3O2)OC4C(C(C(C(O4)C(=O)O)O)O)O)O)O</chem>                   | 64982    | -4.5 |
| 157 | Nicotianamine                 | <chem>C1CN(C1C(=O)O)CCC(C(=O)O)NCCC(C(=O)O)N</chem>                                                  | 9882882  | -4.2 |
| 158 | Ferruginol                    | <chem>CC(C)C1=C(C=C2C(=C1)CCC3C2(CCCC3(C)C)C)O</chem>                                                | 442027   | -3.9 |
| 159 | Oroxin B                      | <chem>C1=CC=C(C=C1)C2=CC(=O)C3=C(C(=C(C=C3O2)OC4C(C(C(C(O4)COC5C(C(C(C(O5)CO)O)O)O)O)O)O)O)O</chem>  | 10077207 | -5.8 |
| 160 | Sakuranetin                   | <chem>COC1=CC(=C2C(=O)CC(OC2=C1)C3=CC=C(C=C3)O)O</chem>                                              | 73571    | -6.1 |
| 161 | Genistein                     | <chem>C1=CC(=CC=C1C2=COC3=CC(=CC(=C3C2=O)O)O)O</chem>                                                | 5280961  | -8.0 |
| 162 | Genistin                      | <chem>C1=CC(=CC=C1C2=COC3=CC(=CC(=C3C2=O)O)OC4C(C(C(C(O4)CO)O)O)O)O</chem>                           | 5281377  | -3.1 |
| 163 | Ipriflavone                   | <chem>CC(C)OC1=CC2=C(C=C1)C(=O)C(=CO2)C3=CC=CC=C3</chem>                                             | 3747     | -5.6 |
| 164 | Puerarin                      | <chem>C1=CC(=CC=C1C2=COC3=C(C2=O)C=CC(=C3C4C(C(C(C(O4)CO)O)O)O)O)O</chem>                            | 5281807  | -7.1 |
| 167 | Glabridin                     | <chem>CC1(C=CC2=C(O1)C=CC3=C2OCC(C3)C4=C(C=C(C=C4)O)O)C</chem>                                       | 124052   | -6.0 |
| 168 | Diosmin                       | <chem>CC1C(C(C(C(O1)OCC2C(C(C(C(O2)OC3=CC(=C4C(=C3)OC(=CC4=O)C5=CC(=C(C=C5)OC)O)O)O)O)O)O)O)O</chem> | 5281613  | -3.2 |
| 169 | Diosmetin                     | <chem>COC1=C(C=C(C=C1)C2=CC(=O)C3=C(C=C(C=C3O2)O)O)O</chem>                                          | 5281612  | -6.7 |
| 170 | Skullcapflavone II            | <chem>COC1=CC=CC(=C1C2=CC(=O)C3=C(C(=C(C=C3O2)OC)OC)OC)O</chem>                                      | 124211   | -5.6 |
| 171 | beta-Naphthoflavone           | <chem>C1=CC=C(C=C1)C2=CC(=O)C3=C(O2)C=CC4=CC=CC=C43</chem>                                           | 2361     | -4.5 |
| 172 | Orientin                      | <chem>C1=CC(=C(C=C1C2=CC(=O)C3=C(O2)C(=C(C=C3O)O)C4C(C(C(C(O4)CO)O)O)O)O)O</chem>                    | 5281675  | -3.2 |
| 173 | Acacetin                      | <chem>COC1=CC=C(C=C1)C2=CC(=O)C3=C(C=C(C=C3O2)O)O</chem>                                             | 5280442  | -4.5 |
| 174 | Apigenin 7-O-neohesperidoside | <chem>CC1C(C(C(C(O1)OC2C(C(C(OC2OC3=CC(=C4C(=C3)OC(=CC4=O)C5=CC(=C(C=C5)O)O)CO)O)O)O)O)O)O</chem>    | 5459217  | -7.2 |
| 175 | Sinensetin                    | <chem>COC1=C(C=C(C=C1)C2=CC(=O)C3=C(C(=C(C=C3O2)OC)OC)OC)OC</chem>                                   | 145659   | -5.6 |
| 176 | Cirsiliol                     | <chem>COC1=C(C(=C2C(=C1)OC(=CC2=O)C3=CC(=C(C=C3)O)O)O)OC</chem>                                      | 160237   | -3.4 |
| 177 | Homoplantaginin               | <chem>COC1=C(C=C2C(=C1O)C(=O)C=C(O2)C3=CC=C(C=C3)O)OC4C(C(C(C(O4)CO)O)O)O</chem>                     | 5318083  | -5.6 |
| 178 | Fisetin                       | <chem>C1=CC(=C(C=C1C2=C(C(=O)C3=C(O2)C=C(C=C3)O)O)O)O</chem>                                         | 5281614  | -4.3 |
| 179 | Quercitrin                    | <chem>CC1C(C(C(C(O1)OC2=C(OC3=CC(=CC(=C3C2=O)O)O)C4=CC(=C(C=C4)O)O)O)O)O</chem>                      | 5280459  | -5.6 |
| 180 | Quercetin 3-β-D-glucoside     | <chem>C1=CC(=C(C=C1C2=C(C(=O)C3=C(C=C(C=C3O2)O)O)OC4C(C(C(C(O4)CO)O)O)O)O)O</chem>                   | 5280804  | -7.1 |

|     |                                            |                                                                                                                                                          |           |      |
|-----|--------------------------------------------|----------------------------------------------------------------------------------------------------------------------------------------------------------|-----------|------|
| 181 | Kaempferol 7-O- $\beta$ -D-glucopyranoside | <chem>C1=CC(=CC=C1C2=C(C(=O)C3=C(C=C(C=C3O2)OC4C(C(C(C(O4)CO)O)O)O)O)O)O</chem>                                                                          | 10095180  | -3.2 |
| 182 | Mangiferin                                 | <chem>C1=C2C(=CC(=C1O)O)OC3=C(C2=O)C(=C(C(=C3)O)C4C(C(C(C(O4)CO)O)O)O)O</chem>                                                                           | 5281647   | -6.2 |
| 183 | Auraptene                                  | <chem>CC(=CCCC(=CCOC1=CC2=C(C=C1)C=CC(=O)O2)C)C</chem>                                                                                                   | 1550607   | -4.5 |
| 184 | Neohesperidin dihydrochalcone              | <chem>CC1C(C(C(C(O1)OC2C(C(C(OC2OC3=CC(=C(C(=C3)O)C(=O)CCC4=CC(=C(C=C4)OC)O)O)CO)O)O)O)O)O</chem>                                                        | 30231     | -7.1 |
| 185 | Sofalcone                                  | <chem>CC(=CCOC1=CC=C(C=C1)C=CC(=O)C2=C(C=C(C=C2)OC=C(C)C)OCC(=O)O)C</chem>                                                                               | 5282219   | -6.8 |
| 186 | Dienestrol                                 | <chem>CC=C(C1=CC=C(C=C1)O)C(=CC)C2=CC=C(C=C2)O</chem>                                                                                                    | 667476    | -6.6 |
| 187 | Isoxanthohumol                             | <chem>CC(=CCC1=C2C=C(C=C1O)OC)C(=O)CC(O2)C3=CC=C(C=C3)O)C</chem>                                                                                         | 513197    | -6.2 |
| 188 | Astilbin                                   | <chem>CC1C(C(C(C(O1)OC2C(OC3=CC(=CC(=C3C2=O)O)O)C4=C(C=C(C=C4)O)O)O)O)O</chem>                                                                           | 119258    | -4.1 |
| 189 | Silibinin                                  | <chem>COC1=C(C=CC(=C1)C2C(OC3=C(O2)C=C(C=C3)C4C(C(=O)C5=C(C=C(C=C5O4)O)O)O)CO)O</chem>                                                                   | 31553     | -3.8 |
| 190 | (+)-taxifolin                              | <chem>C1=CC(=C(C=C1C2C(C(=O)C3=C(C=C(C=C3O2)O)O)O)O)O</chem>                                                                                             | 439533    | -6.2 |
| 191 | Icaritin                                   | <chem>CC(=CCC1=C2C=C(C=C1O)O)C(=O)C(=C(O2)C3=CC=C(C=C3)OC)O)C</chem>                                                                                     | 5318980   | -5.1 |
| 192 | (-)-Epicatechin                            | <chem>C1C(C(OC2=CC(=CC(=C21)O)O)C3=CC(=C(C=C3)O)O)O</chem>                                                                                               | 72276     | -4.5 |
| 193 | ( $\pm$ )-Catechin                         | <chem>C1C(C(OC2=CC(=CC(=C21)O)O)C3=CC(=C(C=C3)O)O)OC(=O)C4=CC(=C(C=C4)O)O)O</chem>                                                                       | 5276454   | -6.8 |
| 194 | (-) Catechin gallate                       | <chem>C1C(C(OC2=CC(=CC(=C21)O)O)C3=CC(=C(C=C3)O)O)OC(=O)C4=CC(=C(C=C4)O)O)O</chem>                                                                       | 6419835   | -7.9 |
| 195 | (+)-Catechin hydrate                       | <chem>C1C(C(OC2=CC(=CC(=C21)O)O)C3=CC(=C(C=C3)O)O)O.O</chem>                                                                                             | 107957    | -7.0 |
| 196 | Pelargonidin                               | <chem>C1=CC(=CC=C1C2=[O+]C3=CC(=CC(=C3C=C2O)O)O)O</chem>                                                                                                 | 440832    | -4.0 |
| 197 | Malvidin                                   | <chem>COC1=CC(=CC(=C1O)OC)C2=[O+]C3=CC(=CC(=C3C=C2O)O)O</chem>                                                                                           | 159287    | -3.2 |
| 198 | Pterostilbene                              | <chem>COC1=CC(=CC(=C1)C=CC2=CC=C(C=C2)O)OC</chem>                                                                                                        | 5281727   | -4.3 |
| 199 | Protocatechuic acid                        | <chem>C1=CC(=C(C=C1C(=O)O)O)O</chem>                                                                                                                     | 72        | -4.5 |
| 200 | Cinnamic acid                              | <chem>C1=CC=C(C=C1)C=CC(=O)O</chem>                                                                                                                      | 444539    | -6.1 |
| 201 | Vanillic acid                              | <chem>COC1=C(C=CC(=C1)C(=O)O)O</chem>                                                                                                                    | 8468      | -5.6 |
| 202 | Cis-p-Coumeric acid                        | <chem>C1=CC(=CC=C1C=CC(=O)O)O</chem>                                                                                                                     | 1549106   | -7.0 |
| 203 | (+)-epicatechin-3-o-gallate                | <chem>C1C(C(OC2=CC(=CC(=C21)O)O)C3=CC(=C(C=C3)O)O)OC(=O)C4=CC(=C(C=C4)O)O)O</chem>                                                                       | 65056     | -7.9 |
| 204 | theaflavin                                 | <chem>C1C(C(OC2=CC(=CC(=C21)O)O)C3=CC(=O)C(=C4C(=C3)C(=CC(=C4O)O)C5C(CC6=C(C=C(C=C6O5)O)O)O)O)O</chem>                                                   | 4263901   | -8.0 |
| 205 | Theaflavin-3-gallate                       | <chem>C1C(C(OC2=CC(=CC(=C21)O)O)C3=CC4=C(C(=C(C=C4C5C(CC6=C(C=C(C=C6O5)O)O)OC(=O)C7=CC(=C(C(=C7)O)O)O)O)C(=O)C(=C3)O)O)O)O</chem>                        | 136825044 | -8.2 |
| 206 | Theaflavin-3,3-digallate                   | <chem>C1C(C(OC2=CC(=CC(=C21)O)O)C3=CC4=C(C(=C(C=C4C5C(CC6=C(C=C(C=C6O5)O)O)OC(=O)C7=CC(=C(C(=C7)O)O)O)O)C(=O)C(=C3)O)OC(=O)C8=CC(=C(C(=C8)O)O)O)O</chem> | 135403795 | -7.8 |
| 207 | Laricitrin                                 | <chem>COC1=CC(=CC(=C1O)C2=C(C(=O)C3=C(C=C(C=C3O2)O)O)O</chem>                                                                                            | 5282154   | -6.1 |
| 208 | Isorhamnetin                               | <chem>COC1=C(C=CC(=C1)C2=C(C(=O)C3=C(C=C(C=C3O2)O)O)OC4C(C(C(C(O4)CO)O)O)O)O</chem>                                                                      | 5318645   | -6.2 |

|     |                       |                                                                          |          |      |
|-----|-----------------------|--------------------------------------------------------------------------|----------|------|
| 209 | Resveratrol           | <chem>C1=CC(=CC=C1C=CC2=CC(=CC(=C2)O)O)O</chem>                          | 445154   | -6.5 |
| 210 | Coutaric acid         | <chem>C1=CC(=CC=C1C=CC(=O)OC(C(C(=O)O)O)C(=O)O)O</chem>                  | 57517924 | -4.2 |
| 211 | Dihydrorobinetin      | <chem>C1=CC2=C(C=C1O)OC(C(C2=O)O)C3=CC(=C(C(=C3)O)O)O</chem>             | 20399    | -5.1 |
| 212 | Robinetin             | <chem>C1=CC2=C(C=C1O)OC(=C(C2=O)O)C3=CC(=C(C(=C3)O)O)O</chem>            | 5281692  | -7.0 |
| 213 | Tricetin              | <chem>C1=C(C=C(C(=C1O)O)O)C2=CC(=O)C3=C(C=C(C=C3O2)O)O</chem>            | 5281701  | -3.4 |
| 214 | Norathyriol           | <chem>C1=C(C=C2C(=C1O)C(=O)C3=CC(=C(C=C3O2)O)O)O</chem>                  | 5281656  | -4.5 |
| 215 | Pectolinarigenin      | <chem>COC1=CC=C(C=C1)C2=CC(=O)C3=C(O2)C=C(C(=C3O)OC)O</chem>             | 5320438  | -6.2 |
| 216 | Urolithin A           | <chem>C1=CC2=C(C=C1O)C(=O)OC3=C2C=CC(=C3)O</chem>                        | 5488186  | -7.0 |
| 217 | Pinocembrin           | <chem>C1C(OC2=CC(=CC(=C2C1=O)O)O)C3=CC=CC=C3</chem>                      | 68071    | -5.2 |
| 218 | Dalbergin             | <chem>COC1=C(C=C2C(=CC(=O)OC2=C1)C3=CC=CC=C3)O</chem>                    | 442768   | -4.8 |
| 219 | Biochanin A           | <chem>COC1=CC=C(C=C1)C2=COC3=CC(=CC(=C3C2=O)O)O</chem>                   | 5280373  | -4.6 |
| 220 | Pinostrobin           | <chem>COC1=CC(=C2C(=O)CC(OC2=C1)C3=CC=CC=C3)O</chem>                     | 73201    | -6.2 |
| 221 | Datisctetin           | <chem>C1=CC=C(C(=C1)C2=C(C(=O)C3=C(C=C(C=C3O2)O)O)O)O</chem>             | 5281610  | -6.3 |
| 222 | Glycitein             | <chem>COC1=C(C=C2C(=C1)C(=O)C(=CO2)C3=CC=C(C=C3)O)O</chem>               | 5317750  | -5.6 |
| 223 | Phloretin             | <chem>C1=CC(=CC=C1CCC(=O)C2=C(C=C(C=C2O)O)O)O</chem>                     | 4788     | -4.1 |
| 224 | Angolensin            | <chem>CC(C1=CC=C(C=C1)OC)C(=O)C2=C(C=C(C=C2)O)O</chem>                   | 3584988  | -4.4 |
| 225 | Liquiritigenin        | <chem>C1C(OC2=C(C1=O)C=CC(=C2)O)C3=CC=C(C=C3)O</chem>                    | 114829   | -3.1 |
| 226 | Prunetin              | <chem>COC1=CC(=C2C(=C1)OC=C(C2=O)C3=CC=C(C=C3)O)O</chem>                 | 5281804  | -6.0 |
| 227 | Isorhapontigenin      | <chem>COC1=C(C=CC(=C1)C=CC2=CC(=CC(=C2)O)O)O</chem>                      | 5318650  | -6.0 |
| 228 | Dihydrocaffeic acid   | <chem>C1=CC(=C(C=C1CCC(=O)O)O)O</chem>                                   | 348154   | -5.9 |
| 229 | 6,7-dehydroroyleanone | <chem>CC(C)C1=C(C2=C(C(=O)C1=O)C3(CCCC(C3C=C2)(C)C)C)O</chem>            | 2751794  | -4.5 |
| 230 | Pinusolidic acid      | <chem>CC12CCCC(C1CCC(=C)C2CCC3=CCOC3=O)(C)C(=O)O</chem>                  | 25880646 | -5.8 |
| 231 | Cadinol               | <chem>CC1=CC2C(CCC(C2CC1)(C)O)C(C)C</chem>                               | 6428423  | -3.2 |
| 232 | Hinokinin             | <chem>C1C(C(C(=O)O1)CC2=CC3=C(C=C2)OCO3)CC4=CC5=C(C=C4)OCO5</chem>       | 442879   | -6.9 |
| 233 | Cryptojaponol         | <chem>CC(C)C1=C(C(=C2C(=C1)C(=O)CC3C2(CCCC3(C)C)C)O)O</chem>             | 11724205 | -6.1 |
| 234 | Forskolin             | <chem>CC(=O)OC1C(C2C(CCC(C2(C3(C1(OC(CC3=O)(C)C=C)C)O)C)C)O)C)C)O</chem> | 47936    | -5.0 |
| 235 | Honokiol              | <chem>C=CCC1=CC(=C(C=C1)O)C2=CC(=C(C=C2)O)CC=C</chem>                    | 72303    | -5.1 |

|     |              |                                                                                                                                            |         |      |
|-----|--------------|--------------------------------------------------------------------------------------------------------------------------------------------|---------|------|
| 236 | Ginkgolide-B | <chem>CC1C(=O)OC2C1(C34C(=O)OC5C3(C2O)C6(C(C5)C(C)(C)C)C(C(=O)OC6O4)O)O</chem>                                                             | 6324617 | -5.5 |
| 237 | Geraniol     | <chem>CC(=CCCC(=CCO)C)C</chem>                                                                                                             | 637566  | -5.2 |
| 238 | Ginkgolide   | <chem>CC1C(=O)OC2C1(C34C(=O)OC5C3(C2O)C6(C(C5)C(C)(C)C)C(C(=O)OC6O4)O)O</chem>                                                             | 65243   | -5.6 |
| 239 | Thymol       | <chem>CC1=CC(=C(C=C1)C(C)C)O</chem>                                                                                                        | 6989    | -3.4 |
| 240 | Steviol      | <chem>CC12CCCC(C1CCC34C2CCC(C3)(C(=C)C4)O)(C)C(=O)O</chem>                                                                                 | 452967  | -4.8 |
| 241 | Salvinorin A | <chem>CC(=O)OC1CC(C2(CCC3C(=O)OC(CC3(C2C1=O)C)C4=CO C=C4)C)C(=O)OC</chem>                                                                  | 128563  | -5.3 |
| 242 | Sclareol     | <chem>CC1(CCCC2(C1CCC(C2CCC(C)(C=C)O)(C)O)C)C</chem>                                                                                       | 163263  | -5.1 |
| 243 | Manoalide    | <chem>CC1=C(C(CCC1)(C)C)CCC(=CCCC2=CCC(OC2O)C3=CC(=O)OC3O)C</chem>                                                                         | 6437368 | -6.0 |
| 244 | Limonin      | <chem>CC1(C2CC(=O)C3(C(C24COC(=O)CC4O1)CCC5(C36C(O6)C(=O)OC5C7=COC=C7)C)C)C</chem>                                                         | 179651  | -6.1 |
| 245 | Casimirolide | <chem>CC1(C2CC(=O)C3(C(C2(C=CC(=O)O1)C)CCC4(C35C(O5)C(=O)OC4C6=COC=C6)C)C)C</chem>                                                         | 500031  | -6.4 |
| 246 | Paclitaxel   | <chem>CC1=C2C(C(=O)C3(C(CC4C(C3C(C(C2(C)C)(CC1OC(=O)C(C(C5=CC=CC=C5)NC(=O)C6=CC=CC=C6)O)O)OC(=O)C7=CC=CC=C7)(C4)OC(=O)C)O)C)OC(=O)C</chem> | 36314   | -4.5 |
| 247 | Humulone     | <chem>CC(C)CC(=O)C1=C(C(=C(C(C1=O)(CC=C(C)C)O)O)CC=C(C)C)O</chem>                                                                          | 442911  | 5.4  |
| 248 | Farnesol     | <chem>CC(=CCCC(=CCCC(=CCO)C)C)C</chem>                                                                                                     | 445070  | 5.1  |

**Table S2.** Evaluation of Lipinski's rule of 5 with a drug-likeness score by Molsoft L.L.C.: DrugLikeness and molecular property prediction of the selected molecules (Top 4 ligands).

| Compounds                    | Mass (<500) | Hydrogen bond donor (<5) | Hydrogen bond acceptor (<10) | LOGP (<5) | Molar Refractivity (40-130) | Drug likeness (>0) |
|------------------------------|-------------|--------------------------|------------------------------|-----------|-----------------------------|--------------------|
| Tellimagrandin I             | 786.09      | 22                       | 13                           | 1.01      | 173.04                      | 0.30               |
| SaikosaponinB2               | 780.47      | 9                        | 13                           | 1.68      | 198.76                      | 0.18               |
| Hesperidin                   | 610.19      | 8                        | 15                           | -1.15     | 140.69                      | 0.94               |
| (-)-Epigallocatechin Gallate | 458.08      | 8                        | 11                           | 2.23      | 108.92                      | 0.23               |

**Table S3.** Metabolism properties of the Tellimagrandin I, SaikosaponinB2, Hesperidin, and (-)-Epigallocatechin Gallate by pKCSM tool.

| <b>Compounds/<br/>Ligands</b>       | <b>CYP2D6<br/>substrate</b> | <b>CYP3A4<br/>substrate</b> | <b>CYP1A2<br/>inhibitor</b> | <b>CYP2C19<br/>inhibitor</b> | <b>CYP2C9<br/>inhibitor</b> | <b>CYP2D6<br/>inhibitor</b> |
|-------------------------------------|-----------------------------|-----------------------------|-----------------------------|------------------------------|-----------------------------|-----------------------------|
| Tellimagrandin I                    | No                          | No                          | No                          | No                           | No                          | No                          |
| SaikosaponinB2                      | No                          | No                          | No                          | No                           | No                          | No                          |
| Hesperidin                          | No                          | No                          | No                          | No                           | No                          | No                          |
| (-)-<br>Epigallocatechin<br>Gallate | No                          | No                          | No                          | No                           | No                          | No                          |

### Supplementary Figures

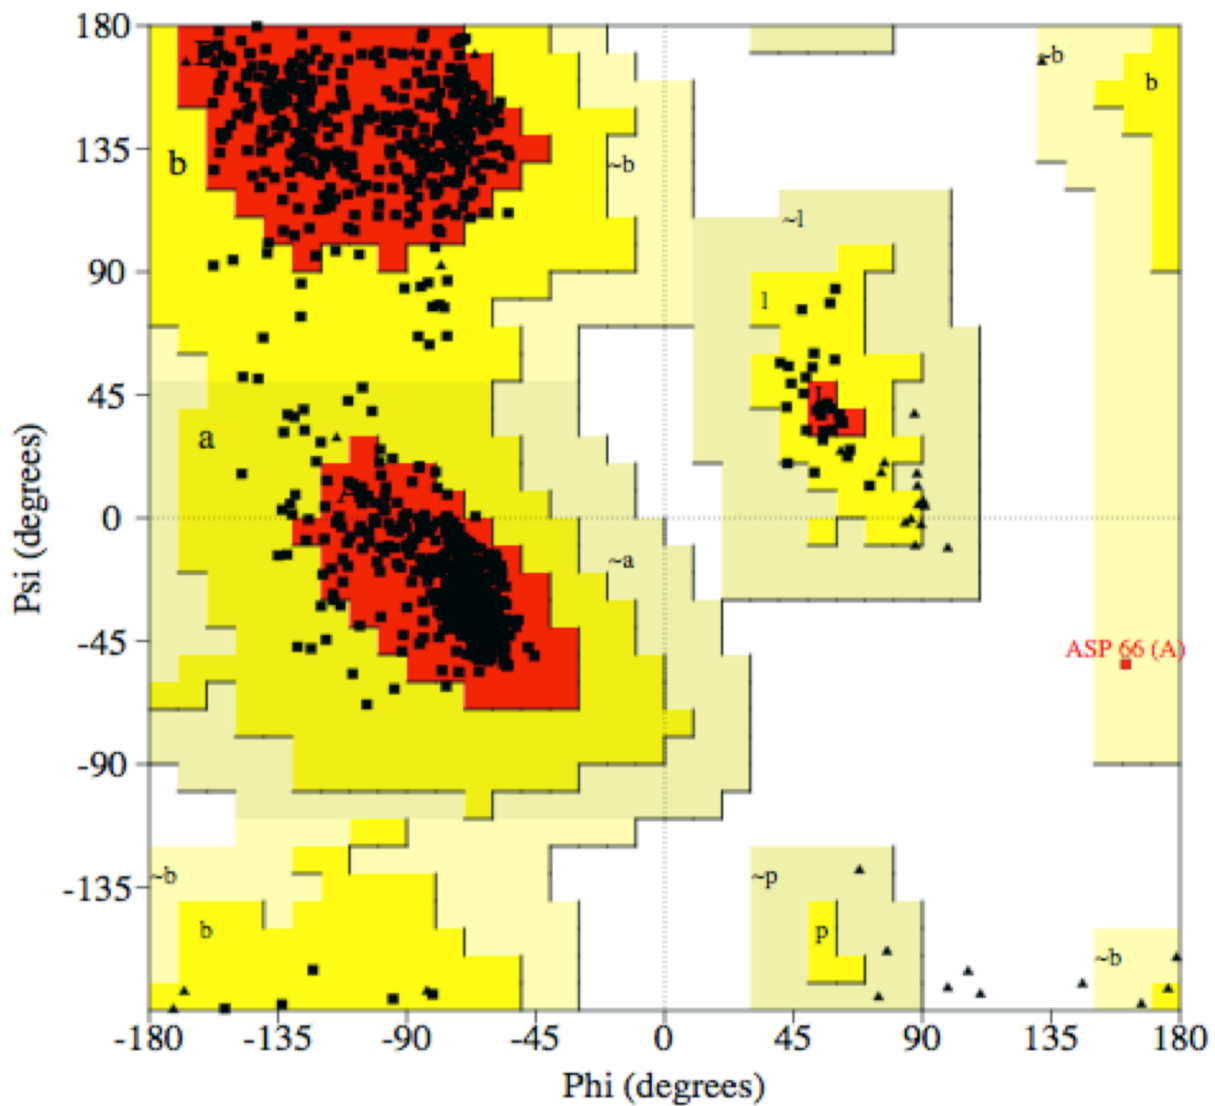

**Figure S1.** Ramachandran Plot of RNA-dependent RNA polymerase (RdRp) of the SARS-CoV-2.

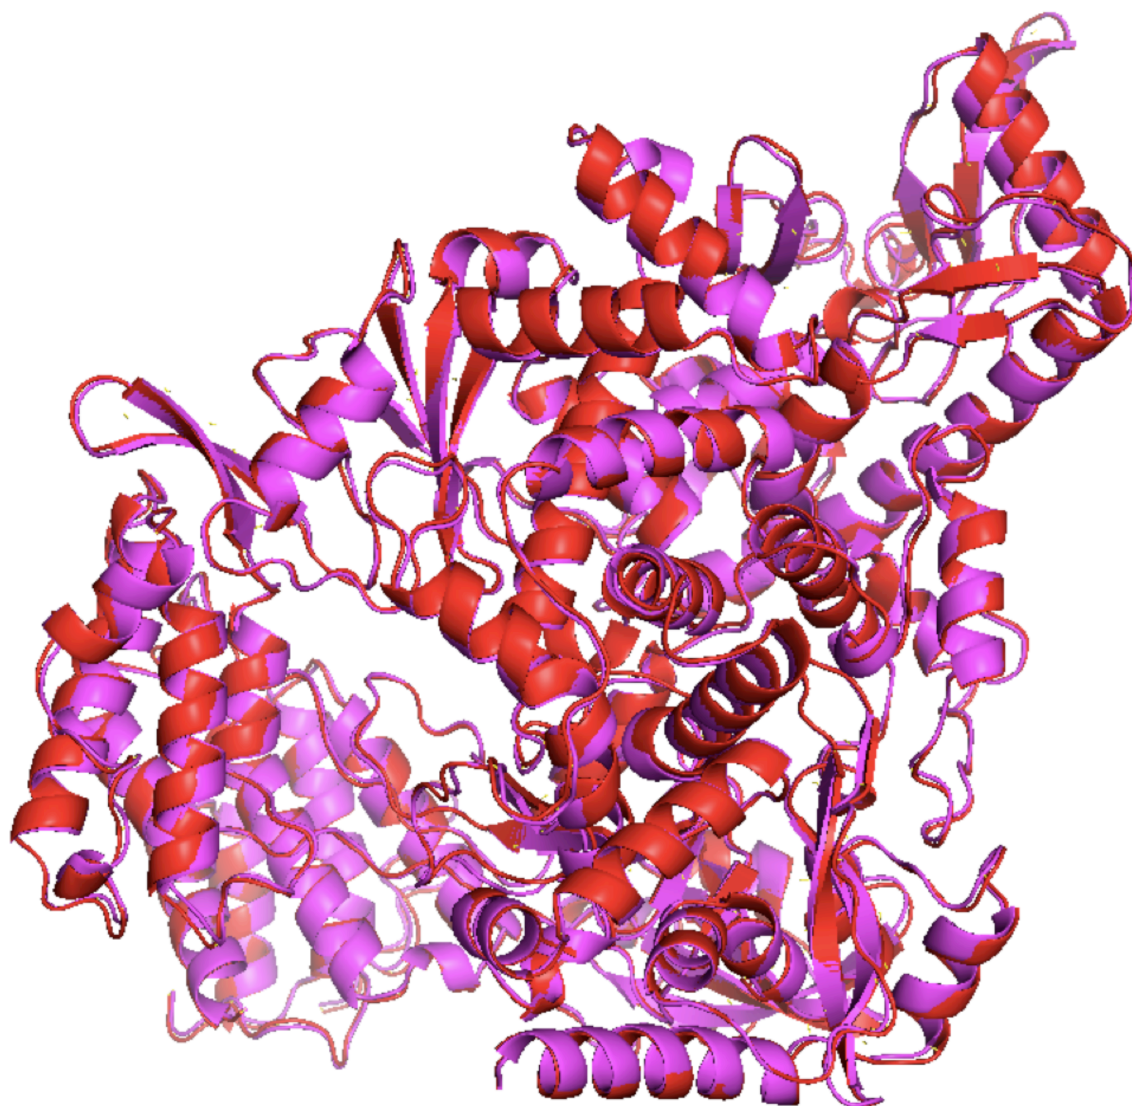

RMSD: 0.47 Å

**Figure S2.** Structure of SARS-CoV-2 RNA-dependent RNA polymerase (RdRp) before (Pink) and after optimization (red), superimposed with RMSD value.

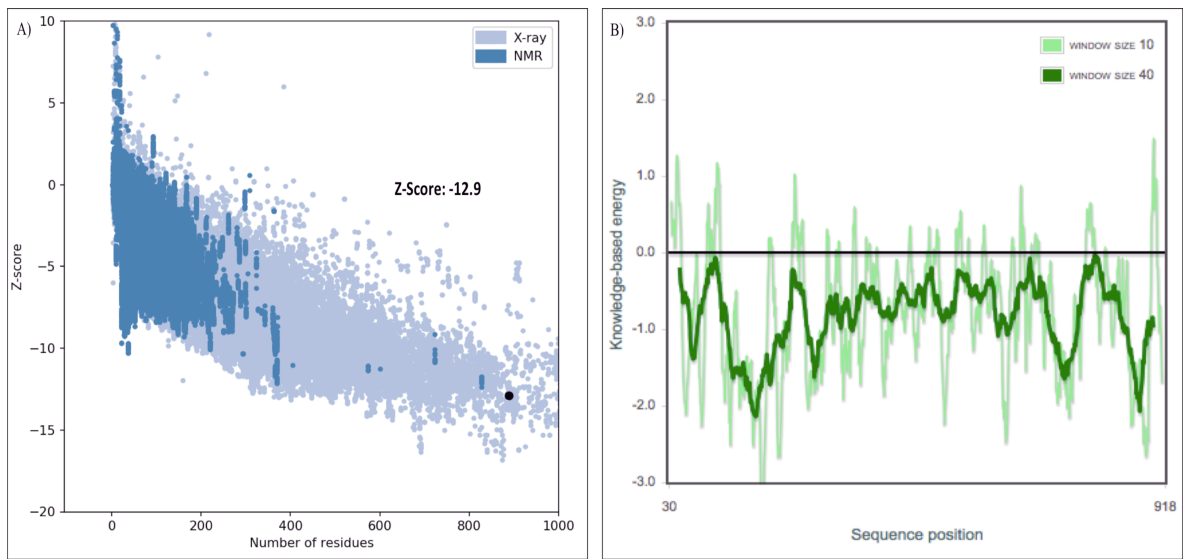

**Figure S3. Structure validation of SARS-CoV-2 RdRp by ProSa.** (A) Z-scores of all protein chains in PDB as calculated by ProSa that are established by X-ray crystallography (light blue) or NMR spectroscopy (dark blue) concerning protein size. The z-score of RdRp is -12.9 and is underlined with a black dot and (B) Energy plot of SARS-CoV-2 RdRp as calculated by ProSA. The thick line indicates average energy with a window size of 40 residues. The thin line indicates average energy over each ten residues fragment in the background of the plot.

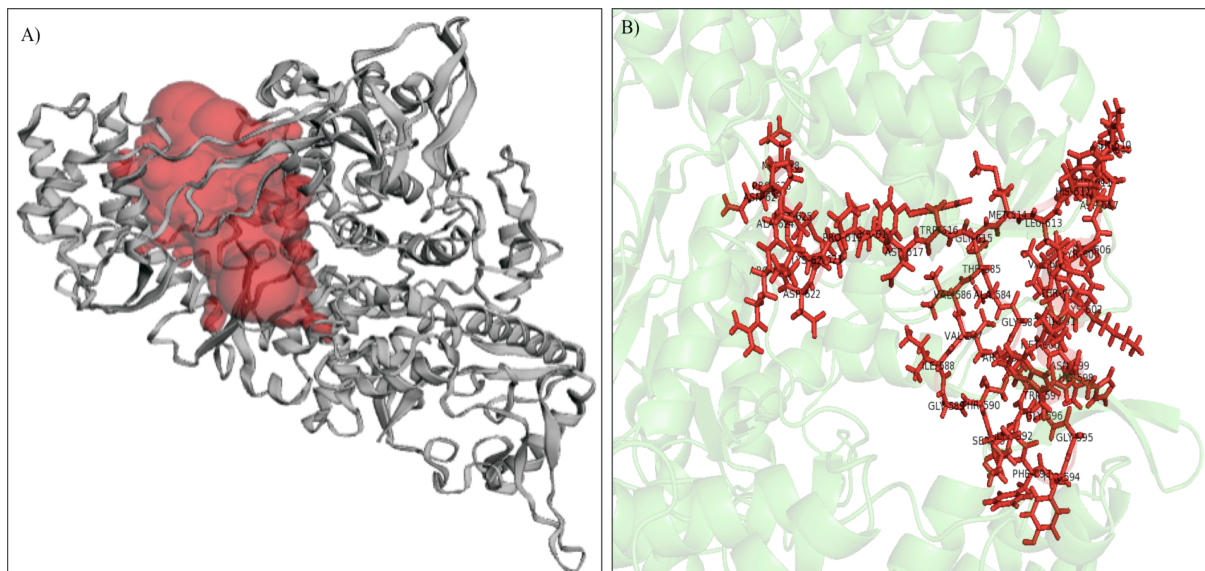

**Figure S4.** (A) Structure of RNA-dependent RNA polymerase (RdRp) of the SARS-CoV-2 with binding pocket (surface and red) as illustrated by CASTp3.0. (B) The structure of SARS-CoV-2 RNA-dependent RNA polymerase (RdRp) (cartoon and green) with predicted binding or active sites are highlighted in red.



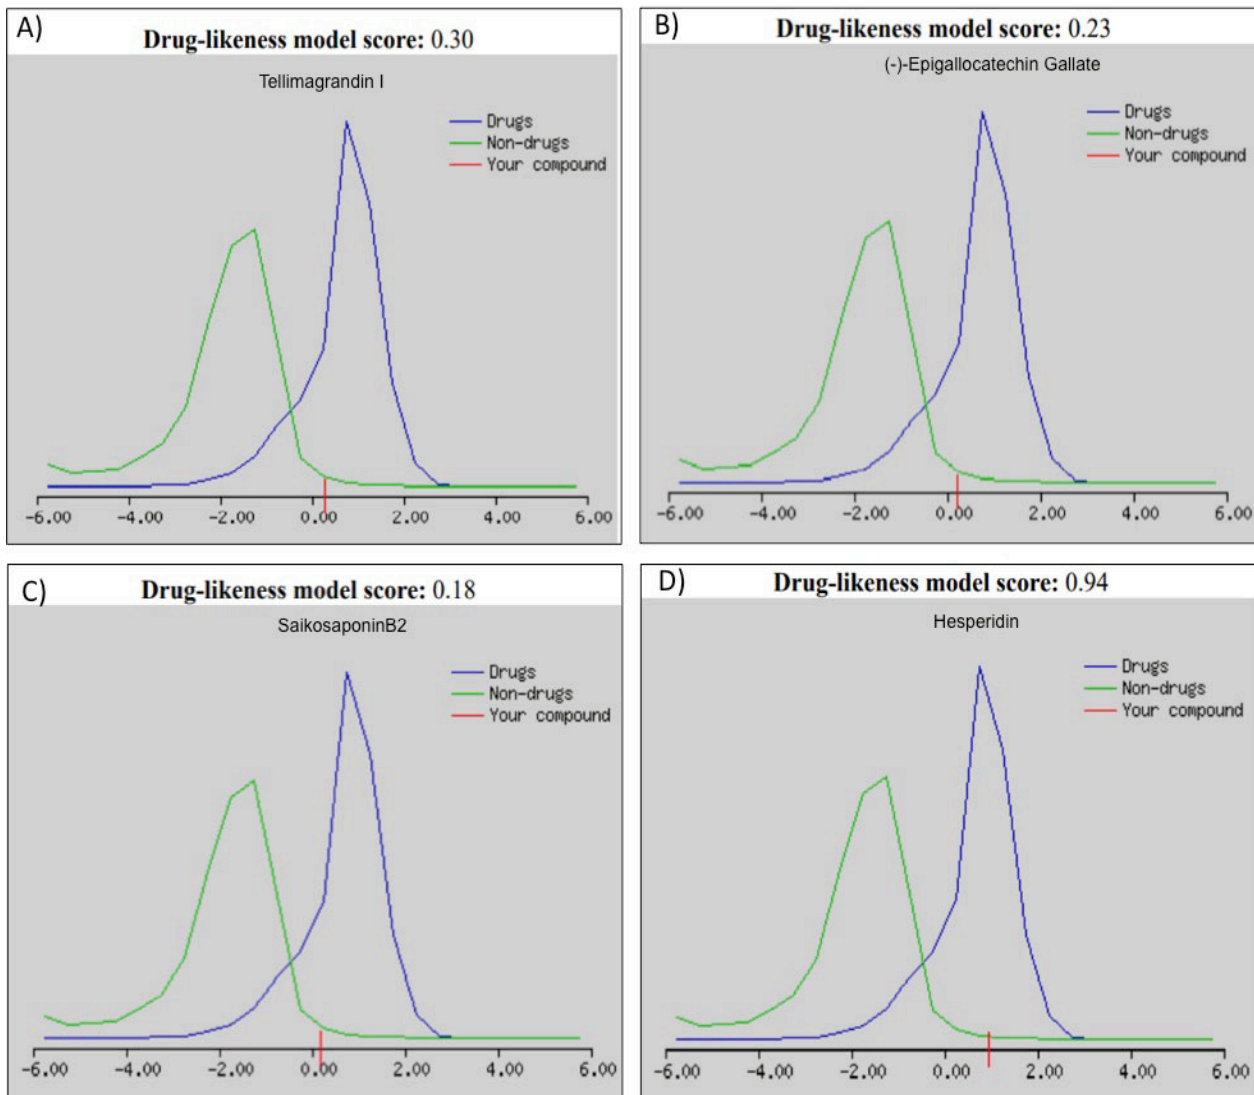

**Figure S5.** Drug likeness evaluation of selected ligands using Molsoft L.L.C.: Drug-Likeness and molecular property prediction. Tellimagrandin I (A), (-)-Epigallocatechin Gallate (B), SaikosaponinB2 (C), and Hesperidin (D).
